# Supplementary material for: Exploring denitrification and anammox processes in the saturated zone of passively operated vegetated biofiltration systems
Source: Royal Society of Chemistry journal article supplement (doi:10.1039/d3ew00347g), 2023-01-01
Supplement: d3ew00347g1.pdf [file d3ew00347g1.pdf]

1 Vegetated biofiltration system for removing nitrogen in wastewater:  
 2 the role of saturated zone and microbial communities

3  
 4 Kefeng Zhang, Veljko Prodanovic, Hengke Zhao, Min Zheng, Shihu Hu, Pei-Ying Hong, Zhiguo Yuan,  
 5 Ana Deletic

6 Supplementary information

7  
 8 **Table S1** The characteristics for electron donors used in this study.

| Materials      | Bulk density (g/mL) | Porosity (%) |
|----------------|---------------------|--------------|
| Walnut shells  | 0.713               | 54           |
| Softwood chips | 0.276               | 61.1         |
| Hardwood chips | 0.244               | 66.7         |

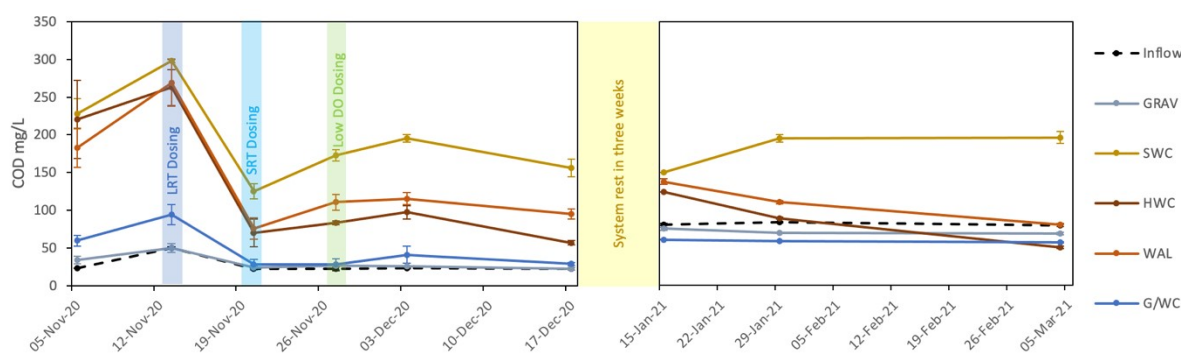

11  
 12 **Figure S1** Mean COD concentration with stand deviation for inflow and different outflows (GRAV,  
 13 SWC, HWC, WAL and G/WC MIX). Sampling run 1-6 is denitrification and 7-9 is mimic anammox. For  
 14 denitrification, standard means 2 days retention and  $DO < 3$ ; LRT (long retention time) means 4 days  
 15 retention; SRT (short retention time) means 1 day retention; Low DO means  $DO < 1$  mg/L. For mimic  
 16 anammox, standard means 2 days retention and  $DO < 1$  mg/L.

17  
 18 **Table S2** 16S Alpha Diversity across different media used in columns.

| Media  | Faith PD |      | Pielou's evenness |      | Observed features |       |
|--------|----------|------|-------------------|------|-------------------|-------|
|        | Mean     | SD   | Mean              | SD   | Mean              | SD    |
| SWC    | 68.6     | 7.3  | 0.75              | 0.01 | 1182.0            | 43.6  |
| HWC    | 60.1     | 6.1  | 0.73              | 0.03 | 1054.3            | 94.8  |
| MIX    | 62.1     | 4.7  | 0.75              | 0.03 | 1066.7            | 114.7 |
| Gravel | 46.1     | 7.5  | 0.65              | 0.03 | 655.0             | 139.0 |
| Walnut | 49.9     | 49.9 | 0.68              | 0.68 | 611.7             | 611.7 |

19

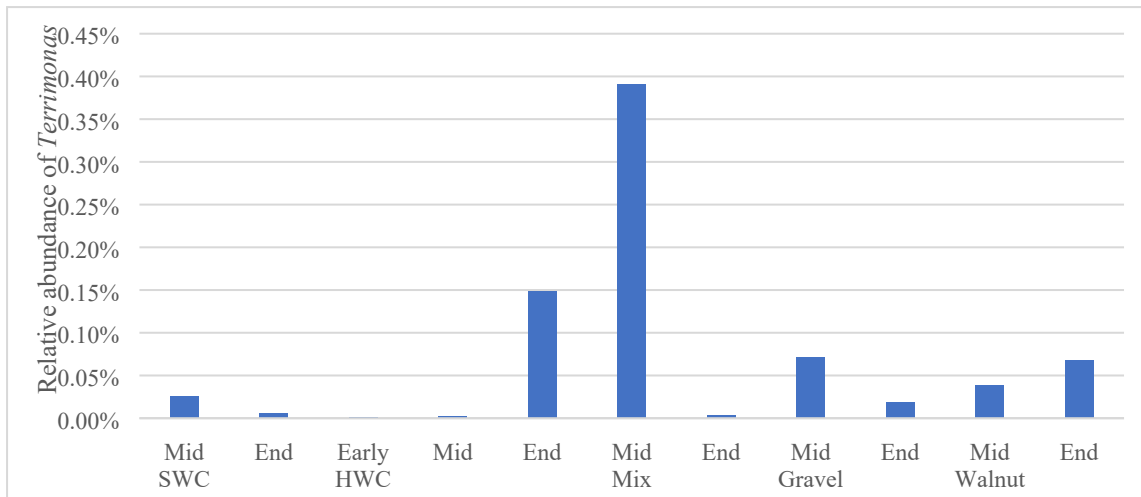

20

21 **Figure S2** Abundance of SM1A02 in different media types over time. Early – media sample collected  
 22 from week3 of the experiment (early stage of denitrification phase), Mid - media sample collected from  
 23 week9 of the experiment (end of denitrification phase), End - media sample collected from week20 of  
 24 the experiment (end of the anammox phase).

25

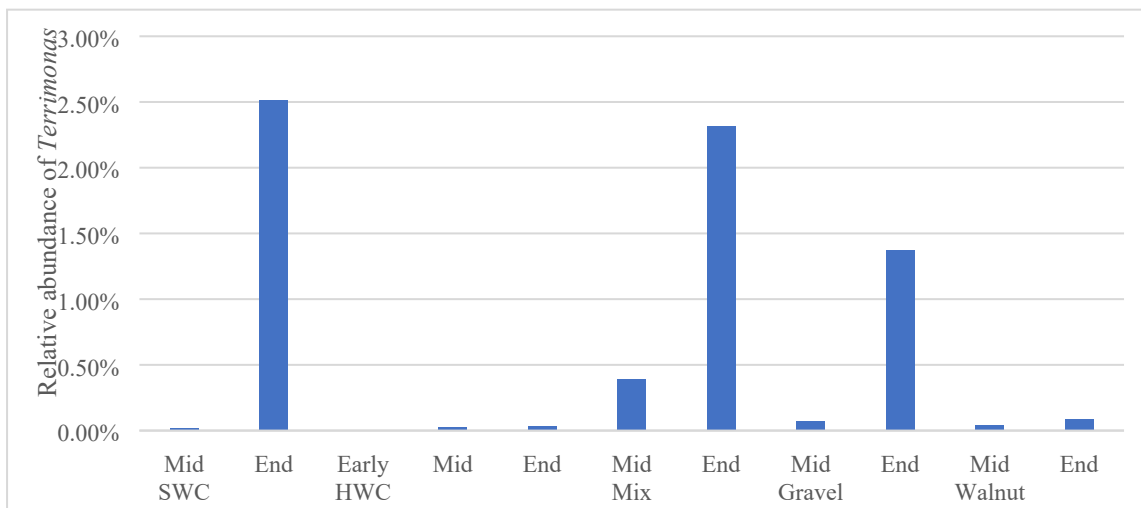

26

27 **Figure S3** Abundance of Terrimonas in different media types over time. Early – media sample collected  
 28 from week3 of the experiment (early stage of denitrification phase), Mid - media sample collected from  
 29 week9 of the experiment (end of denitrification phase), End - media sample collected from week20 of  
 30 the experiment (end of the anammox phase).
